# Supplementary material for: SARS-CoV-2 Spike Protein S1 Induces MG-H1/RAGE Activation to Promote Inflammation in Human Bronchial BEAS-2B Cells
Source: Preprints.org preprint supplement (doi:10.20944/preprints202308.2083.v1), 2023-08-30

Supplementary Material: SARS-CoV-2 Spike Protein S1 Induces MG-H1/RAGE Activation to Promote Inflammation in Human Bronchial BEAS-2B Cells

**Dominga Manfredelli, Marilena Pariano, Claudio Costantini, Alessandro Graziani, Silvia Bozza, Luigina Romani, Paolo Puccetti, Vincenzo Nicola Talesa and Cinzia Antognelli**

**Figure S1.** Cell morphology, by means of phase-contrast microscopy, of BEAS-2B and A549 cells exposed to 25 and 100 ng/ml SARS-CoV-2 spike protein S1 for 6 and 24 hours and controls (0 ng/ml). Scale bar = 200 μm (BEAS-2B-related images), = 400 μm (A549-related images).


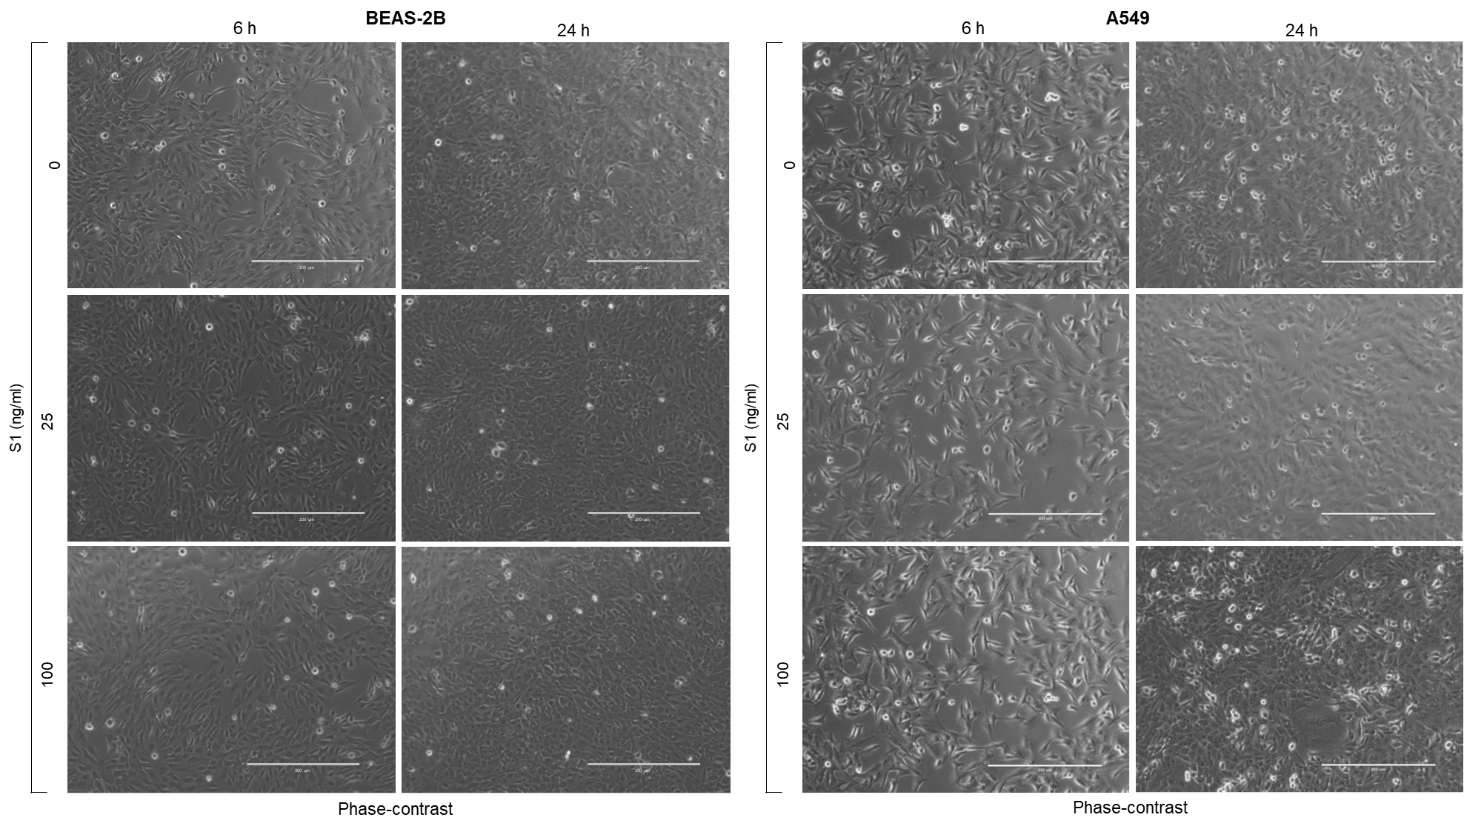


**Figure S2.** SARS-CoV-2 S1 Spike protein induces inflammatory cytokines in human bronchial BEAS-2B and alveolar A549 epithelial cells. BEAS-2B and A549 cells were stimulated with S1 at a concentration of 100 ng/ml. Six and 24 h post-stimulation, the expression of IL-1β was evaluated by real-time RT-PCR, while TNF-α, IL-6 and IL-8 levels, by ELISA. Data represent mean ± SD (n = 3). *p < 0.05, **p < 0.01, ***p < 0.001.

**
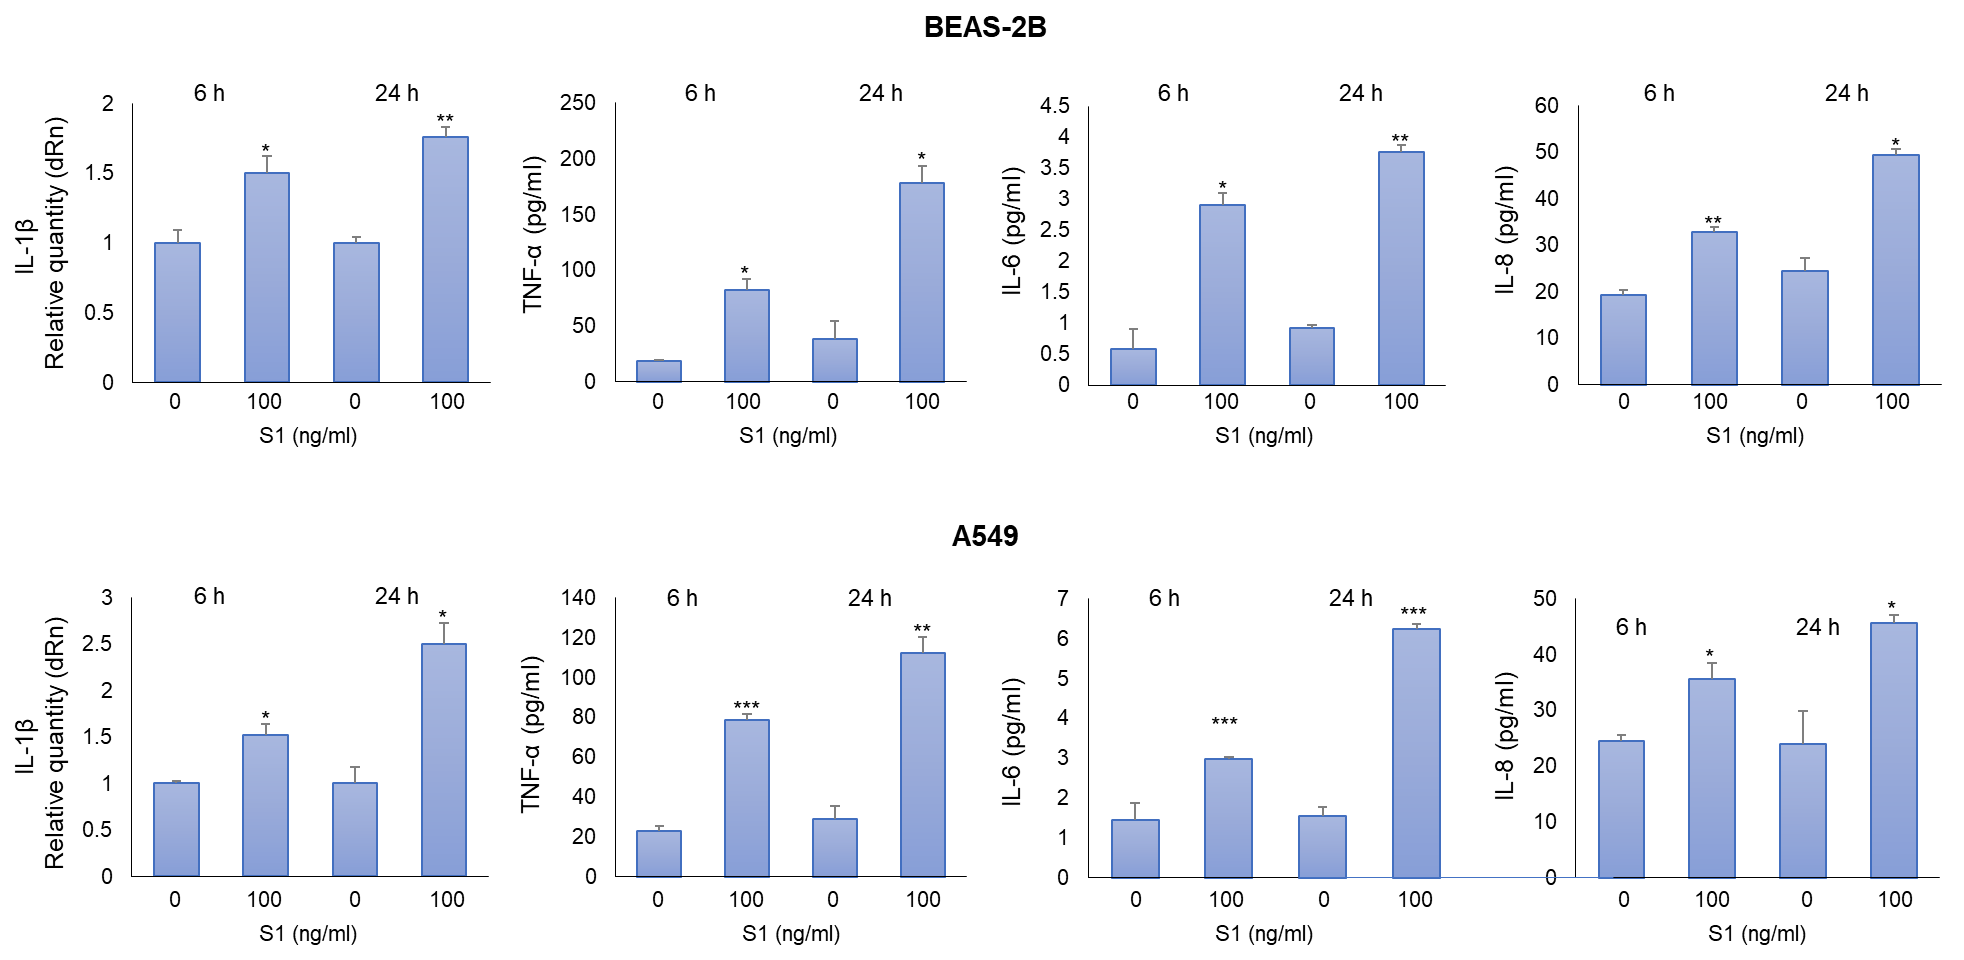
**

**Figure S3.** Glyoxalase 1 (Glo1) mRNA expression in alveolar A549 epithelial cells exposed to 25 ng/ml SARS-CoV-2 S1 spike protein for 24 h. Glo1 expression was evaluated by real-time RT-PCR. Data represent mean ± SD (n = 3). *p < 0.05.


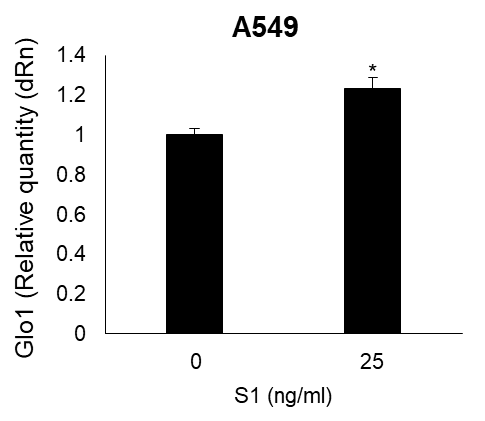


**Figure S4.** Whole blots reported in Figure 3b, Figure 3d and Figure 5a.


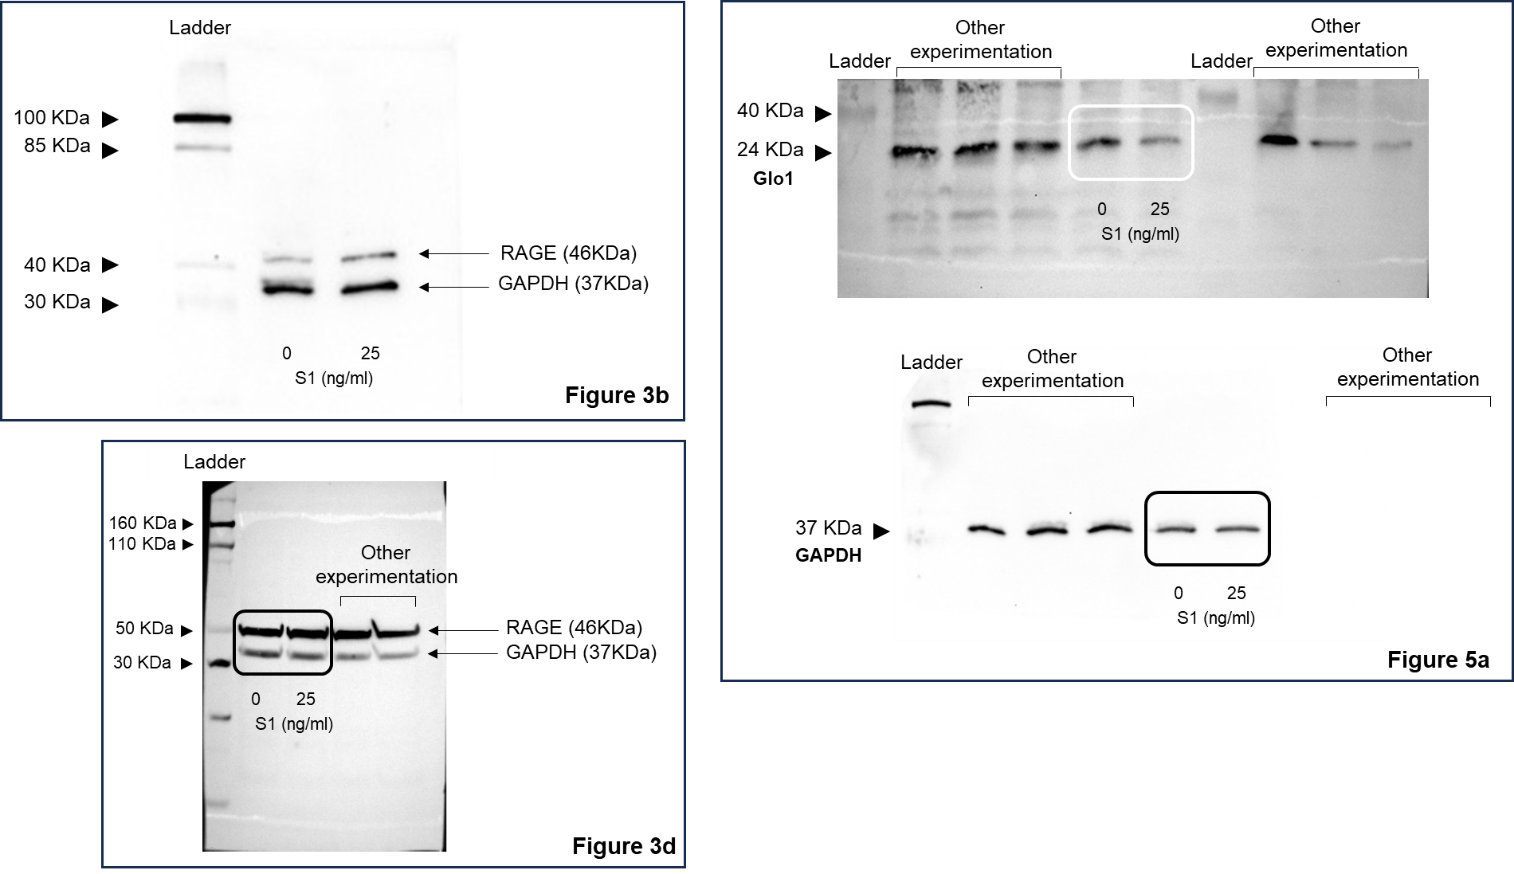

Supplement: Supplementary file 2 [file supplementary]
